# Supplementary material for: Production of Prosaikogenin F, Prosaikogenin G, Saikogenin F and Saikogenin G by the Recombinant Enzymatic Hydrolysis of Saikosaponin and their Anti-Cancer Effect
Source: MDPI journal article supplement (doi:10.3390/molecules27103255), 2022-05-19
Supplement: s1 [file s1]

# **Production of Prosaikogenin F, Prosaikogenin G, Saikogenin F and Saikogenin G by the recombinant enzymatic hydrolysis of Saikosaponin And their anti-cancer effect**

Ji Eun Lee<sup>1</sup> and Wan-Taek Im<sup>1,2,3\*</sup>

<sup>1</sup>Major in Applied Biotechnology, Hankyong National University, 327 Chungang-no Anseong-si, Gyeonggi-do 17579, Republic of Korea

<sup>2</sup>AceEMzyme Co., Ltd., Academic Industry Cooperation, 327 Chungang-no Anseong-si, Gyeonggi-do 17579, Republic of Korea

<sup>3</sup>HK Ginseng Research Center, 327 Chungang-no Anseong-si, Gyeonggi-do 17579, Republic of Korea

\*Corresponding author

E-mail: wandra@hknu.ac.kr

Phone: +82 31 6705335; Fax: +82 31 6705339;

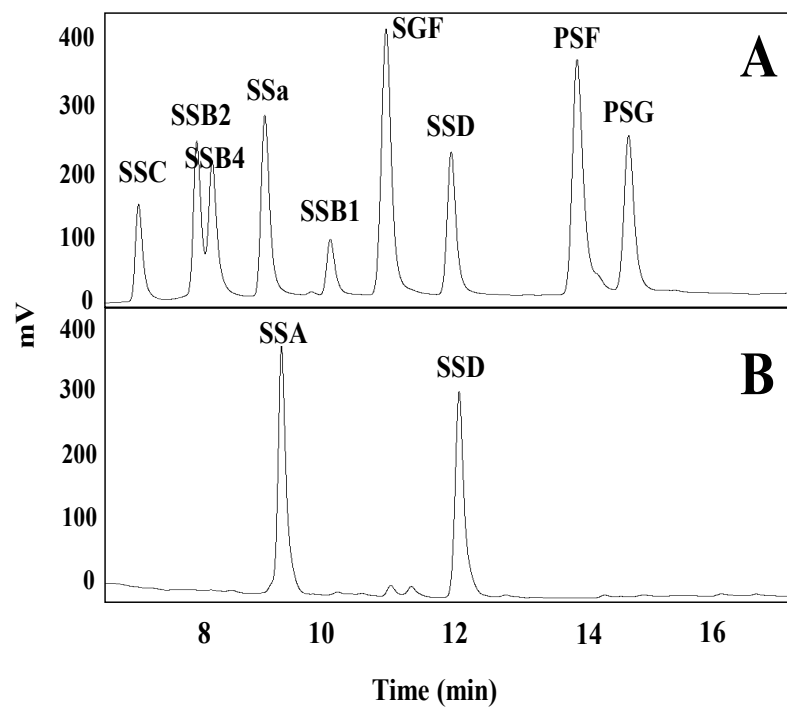

**Supplementary Figure S1.** HPLC analysis of silica purification of *Bupleurum falcatum* L. extract

**(A)** saikosaponin standard; **(B)** saikosaponin A and D mix after silica prep.

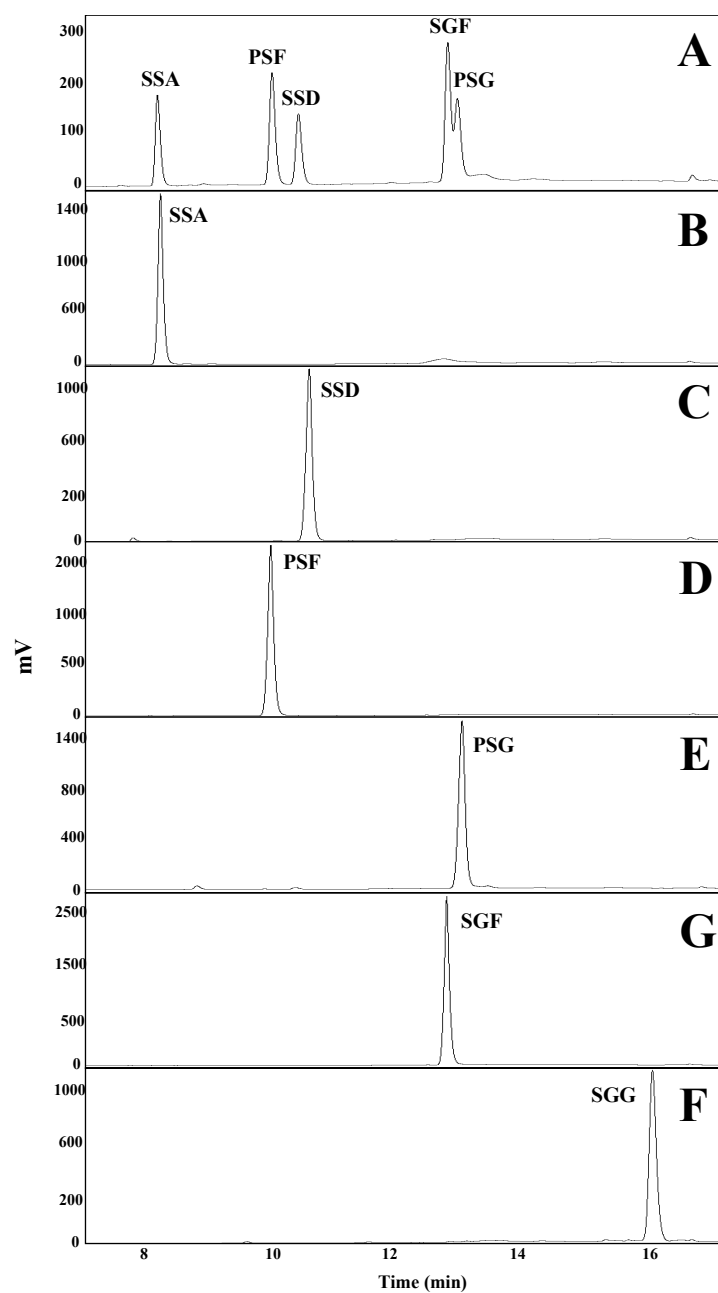

**Supplementary Figure S2.** HPLC analysis of purified saikosaponins using prep-HPLC or silica purification (A) saikosaponin standard; (B) saikosaponin A purified using prep-HPLC; (C) saikosaponin D purified using prep-HPLC; (D) prosaikogenin F purified using silica; (E) prosaikogenin G purified using silica; (G) saikogenin F purified using silica; (F) saikogenin G purified using silica.

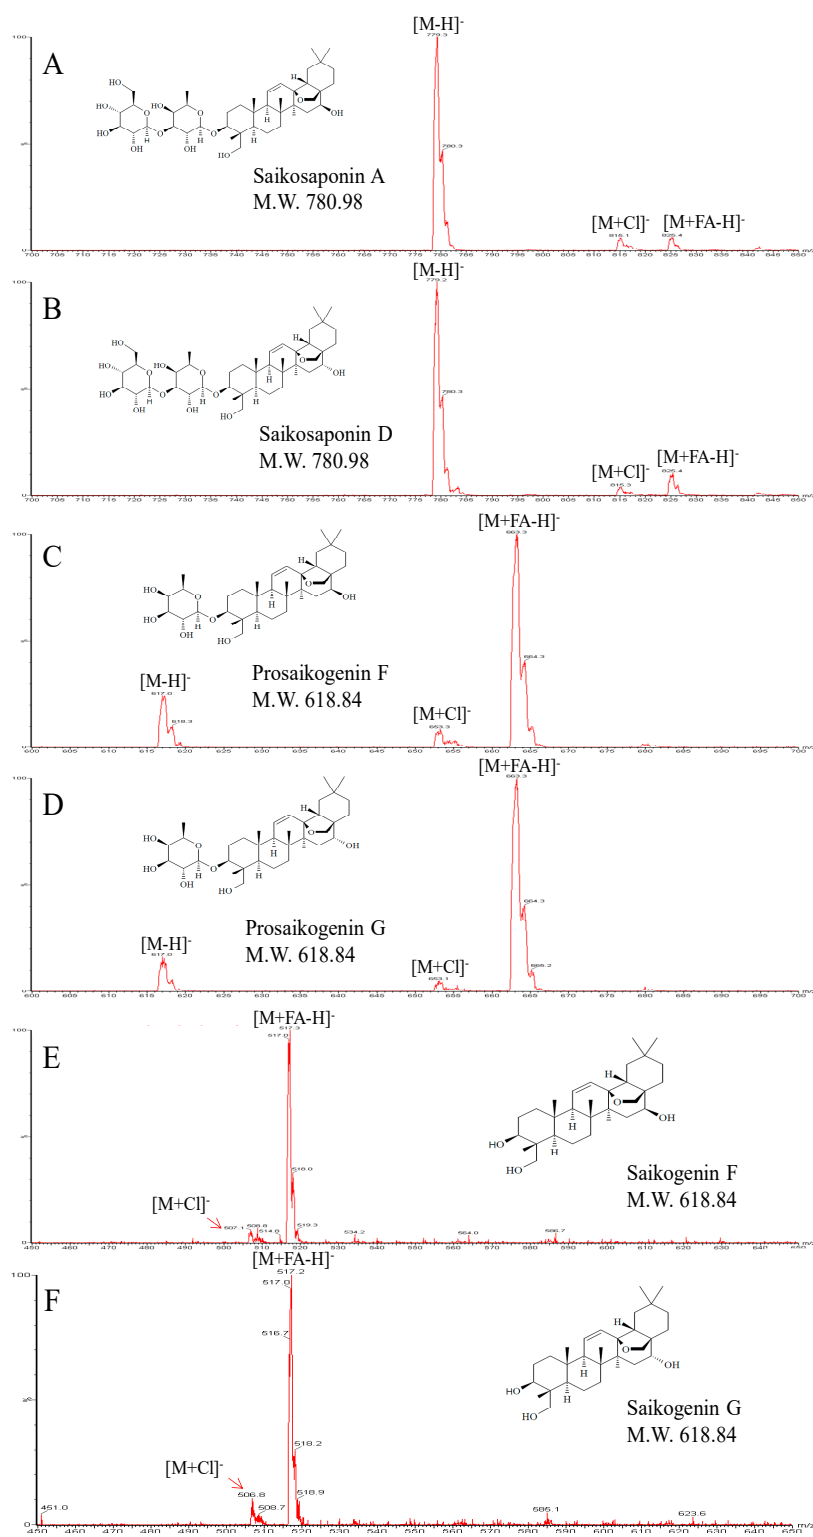

**Supplementary Figure S3.** LC/MS spectrum of purified saikosaponins using prep-HPLC or silica purification.
